# Supplementary material for: A sensitive fluorescent sensor for the detection of trace water in organic solvents based on carbon quantum dots with yellow fluorescence
Source: Royal Society of Chemistry journal article supplement (doi:10.1039/c8ra06732e), 2018-01-01
Supplement: c8ra06732e1.pdf [file c8ra06732e1.pdf]

**A sensitive fluorescent sensor for the Detection of Trace Water in Organic Solvents  
Based on Carbon Quantum Dots of Yellow Fluorescence**

Jianfei Wei<sup>a,b,†</sup>, Haikuo Li<sup>b,†</sup>, Ye Yuan<sup>b</sup>, Chenying Sun<sup>b</sup>, Dan Hao<sup>b</sup>, Guo Zheng<sup>a,\*</sup>, Rui Wang<sup>b,\*</sup>

a. School of Material Science and Engineering, Tianjin Polytechnic University, No. 399 BinShuiXi Road, Xiqing District, Tianjin, P.R. of China

b. School of Material Science and Engineering, Beijing Institute of Fashion Technology, No. A2, East Yinghua Street, Chaoyang District, Beijing, P.R. China, E-mail: clywangrui@bift.edu.cn , Tel: 86-10-64288279

† Jianfei Wei and Haikuo Li contribute equally to this work.

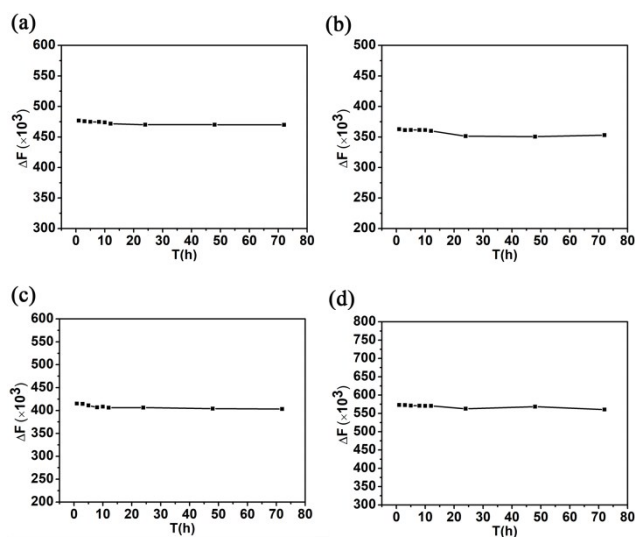

Fig. s1 The stability of CQDs dispersed in (a) toluene, (b) ethanol, (c) 1,4-dioxane, (d) tetrahydrofuran

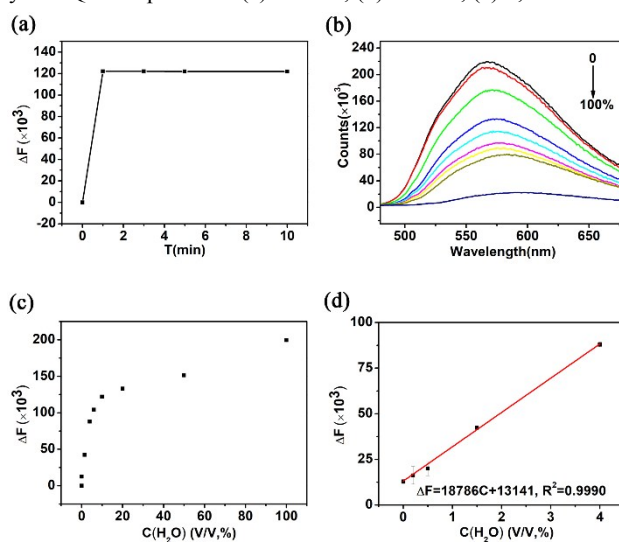

Fig. s2 (a) time-dependent fluorescence quenching of CQDs dispersed in tetrahydrofuran in the presence of H<sub>2</sub>O (10%, V/V); (b) the fluorescence emission spectra of CQDs dispersed in tetrahydrofuran with different concentration of H<sub>2</sub>O (0, 0.001, 1.5, 4, 6, 10, 20, 50, 100 V/V, %); (c) the change of fluorescence intensity of CQDs solution versus the concentration of H<sub>2</sub>O; (d) a linear relationship between  $\Delta F$  and concentration of H<sub>2</sub>O from 0.001 % to 4 %. Error bars in (c) and (d) represent the standard deviations of five independent measurements.

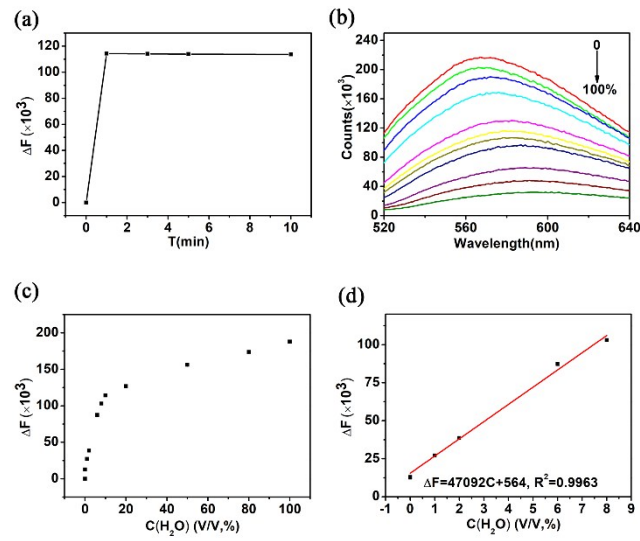

Fig. S3 (a) time-dependent fluorescence quenching of CQDs dispersed in 1,4-Dioxane in the presence of H<sub>2</sub>O (10%,V/V); (b) the fluorescence emission spectra of CQDs dispersed in 1,4-Dioxane with different concentration of H<sub>2</sub>O (0, 0.001, 1, 2, 6, 8, 10, 20, 50, 80, 100 V/V, %); (c) the change of fluorescence intensity of CQDs solution versus the concentration of H<sub>2</sub>O; (d) a linear relationship between  $\Delta F$  and concentration of H<sub>2</sub>O from 0.001 % to 8 %. Error bars in (c) and (d) represent the standard deviations of five independent measurements.
